# Supplementary material
Source: PubMed Central journal article supplement (PMC7862923)

# Extended Figure 2a

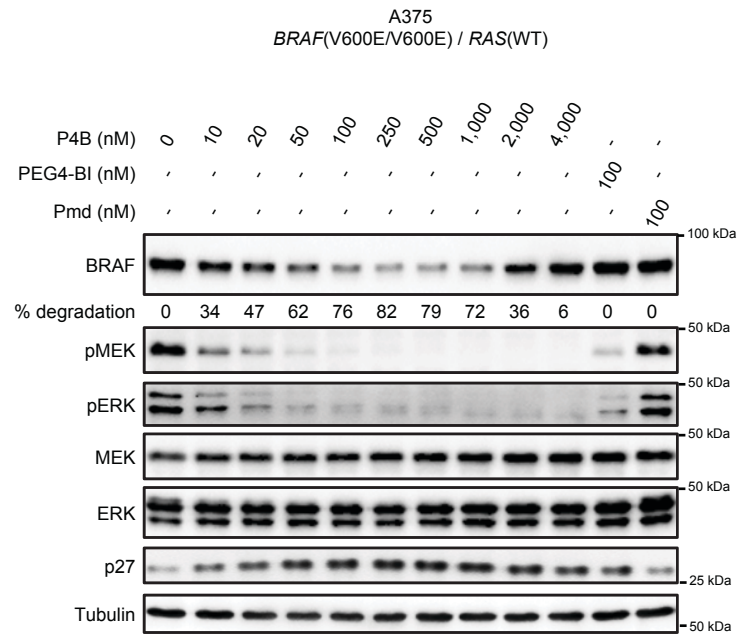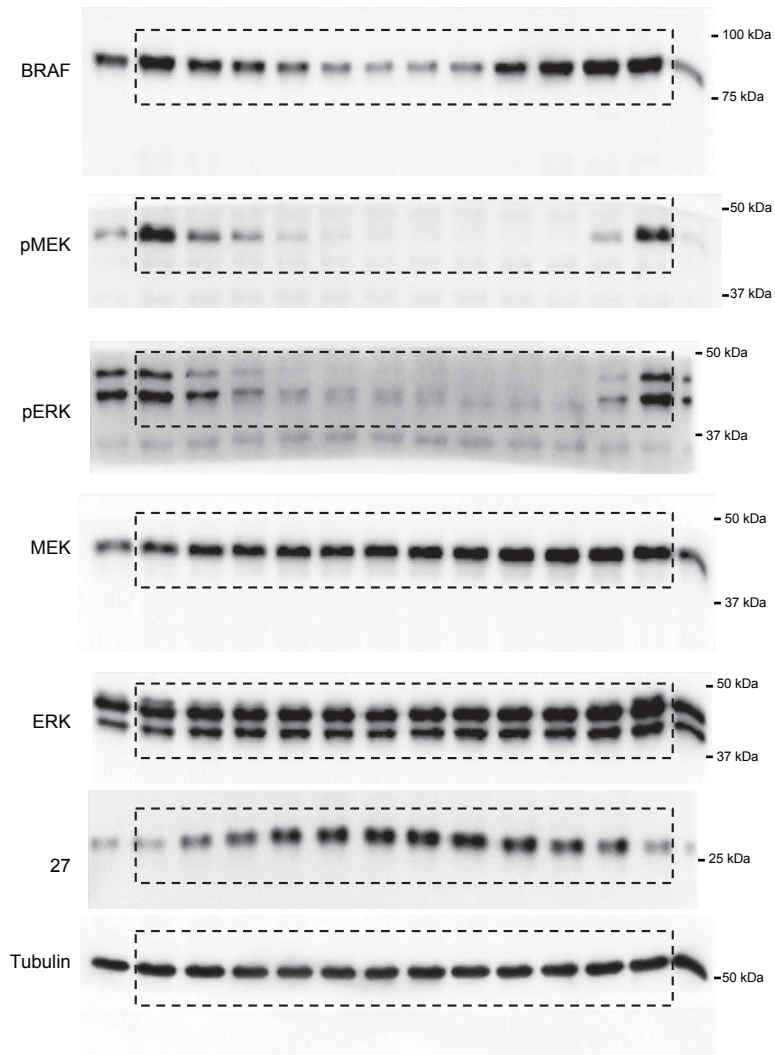

# Extended Figure 2b

A375  
*BRAF(V600E/V600E) / RAS(WT)*

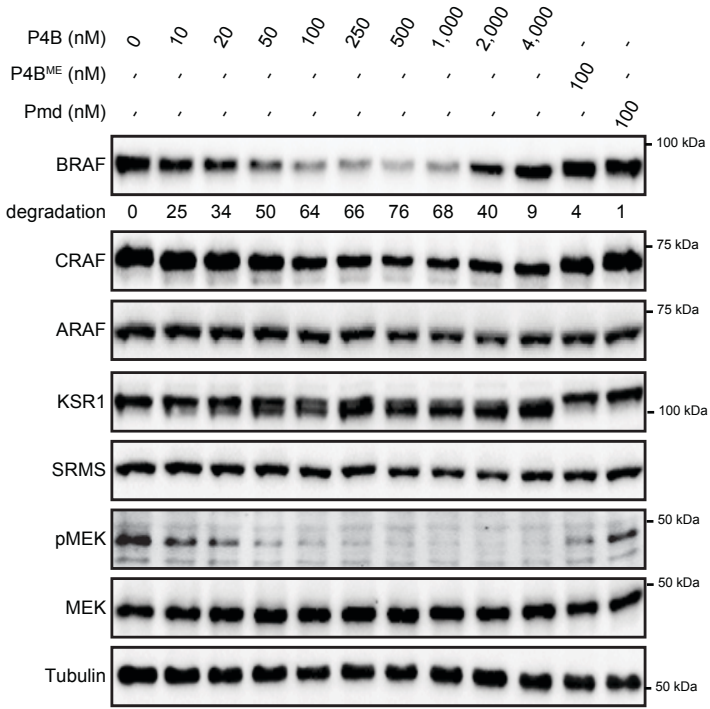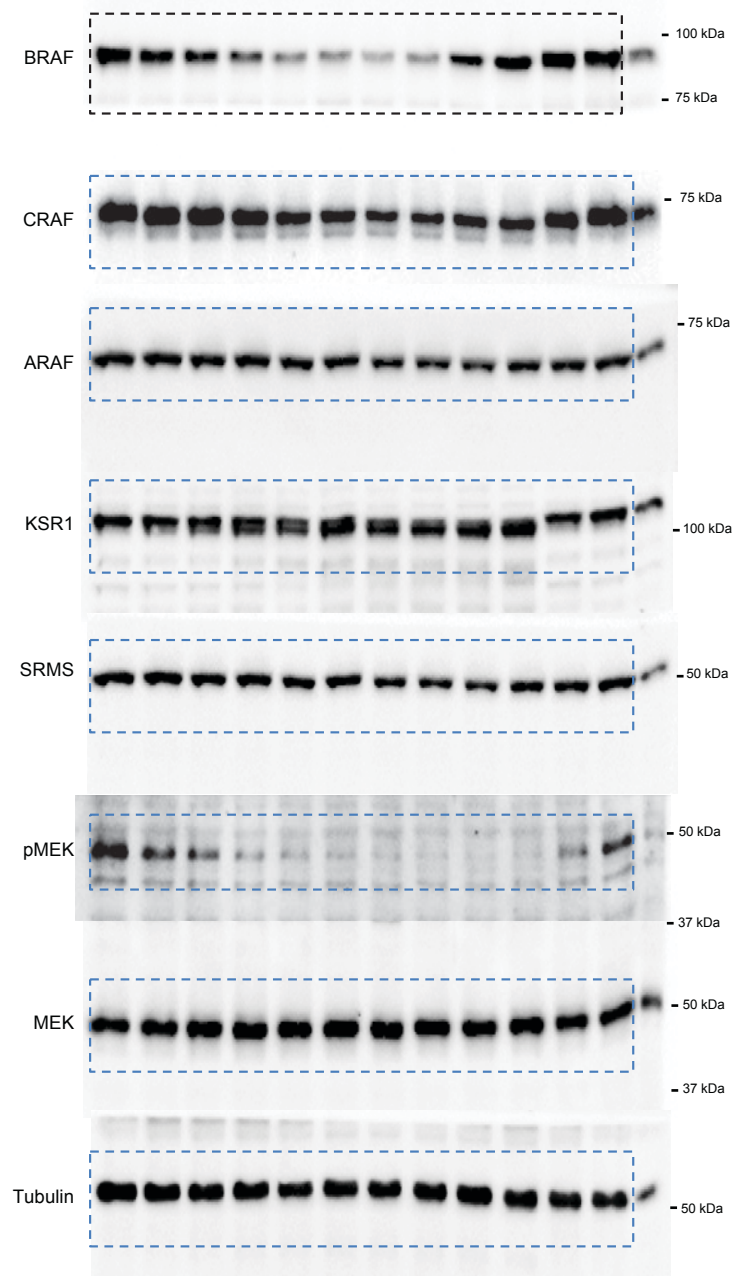

# Extended Figure 2c

SKMEL-28  
*BRAF(V600E/V600E) / RAS(WT)*

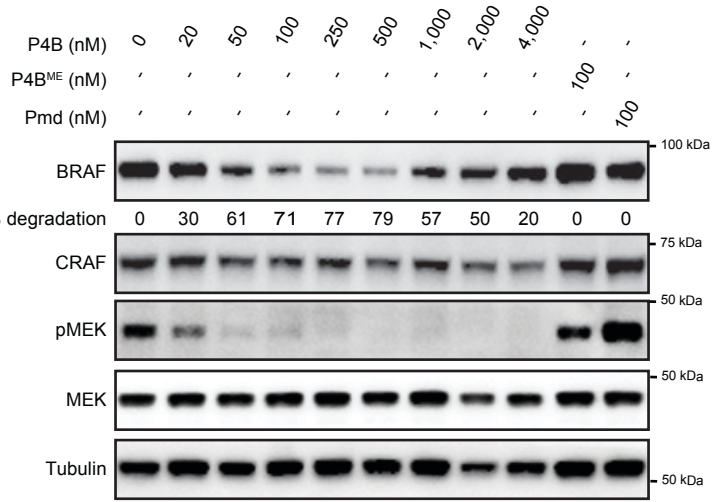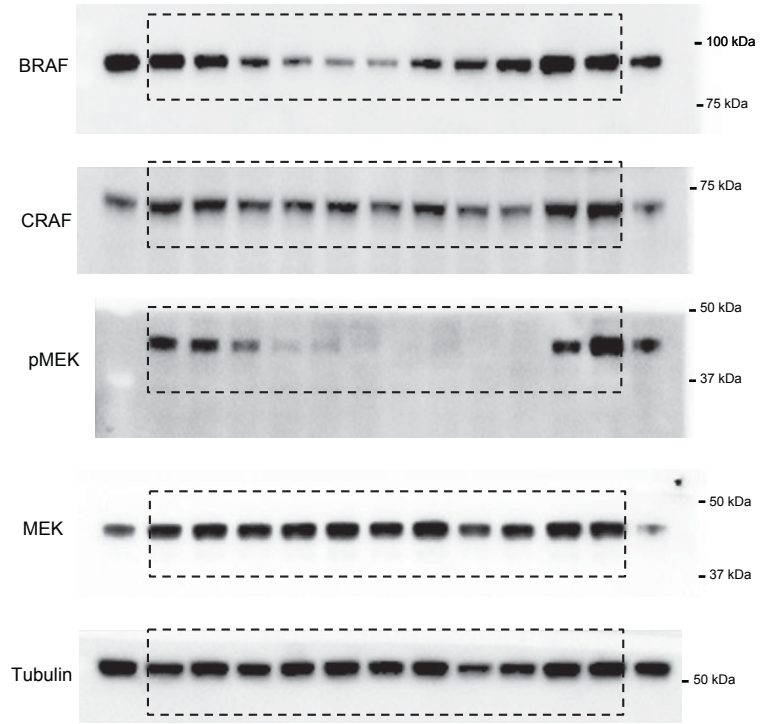

# Extended Figure 2d

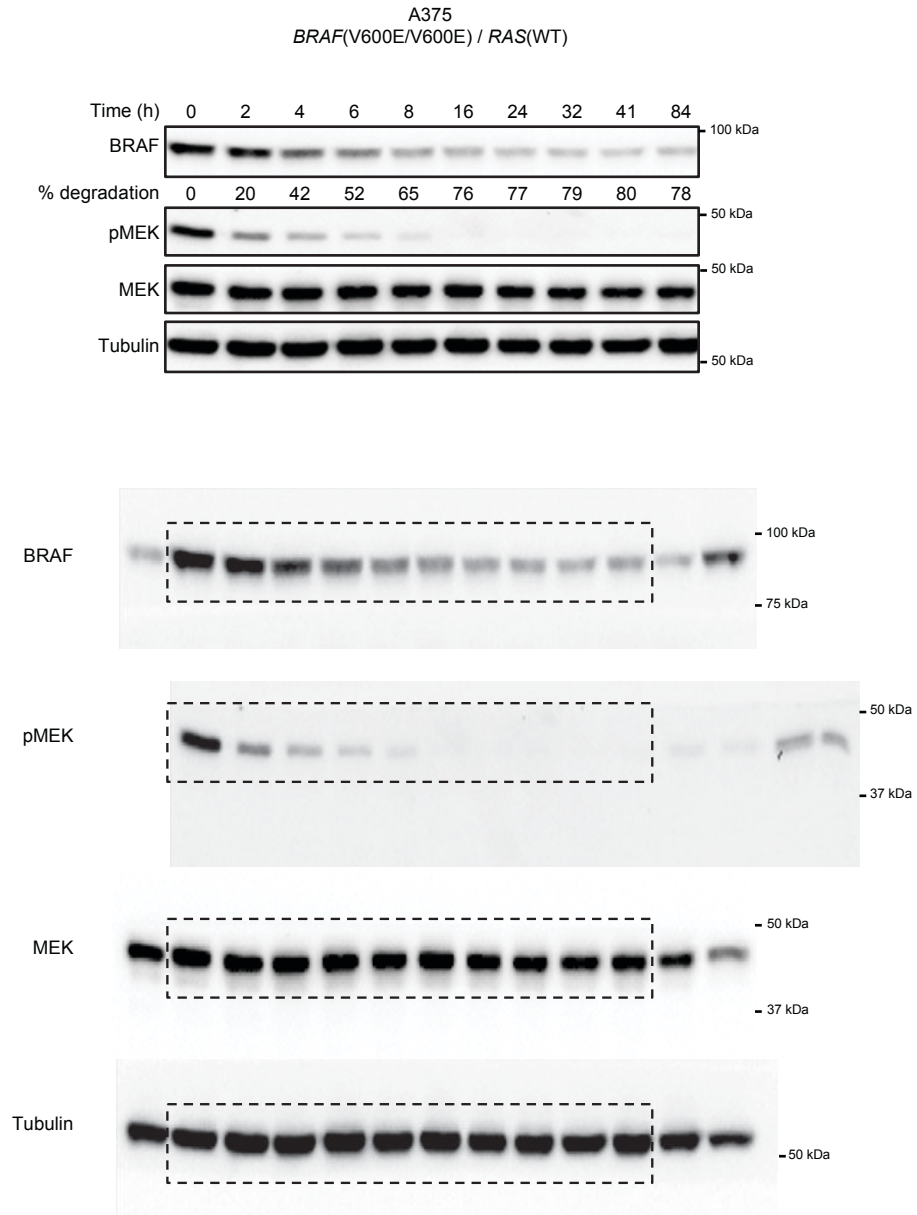

# Extended Figure 2e

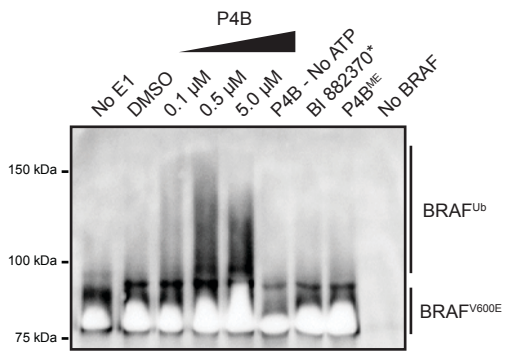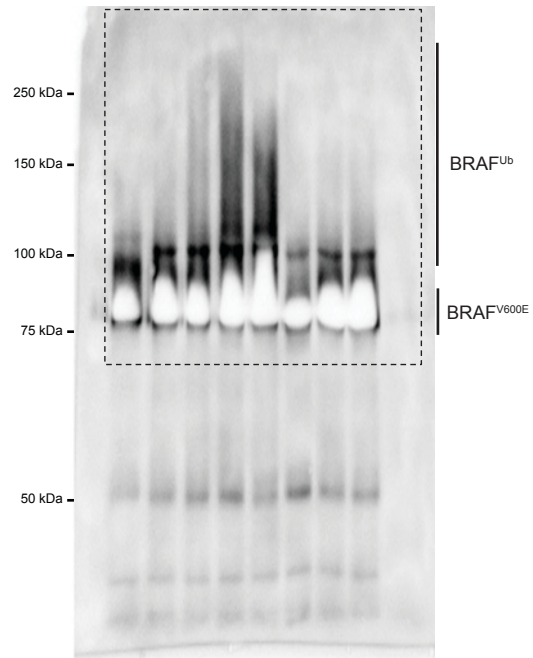

Supplement: NIHMS1652685-supplement-1652685_SourceData_ExtData_Fig2.pdf [file NIHMS1652685-supplement-1652685_SourceData_ExtData_Fig2.pdf]
