# Supplementary material
Source: PubMed Central journal article supplement (PMC7862923)

# Extended Figure 6

**a**

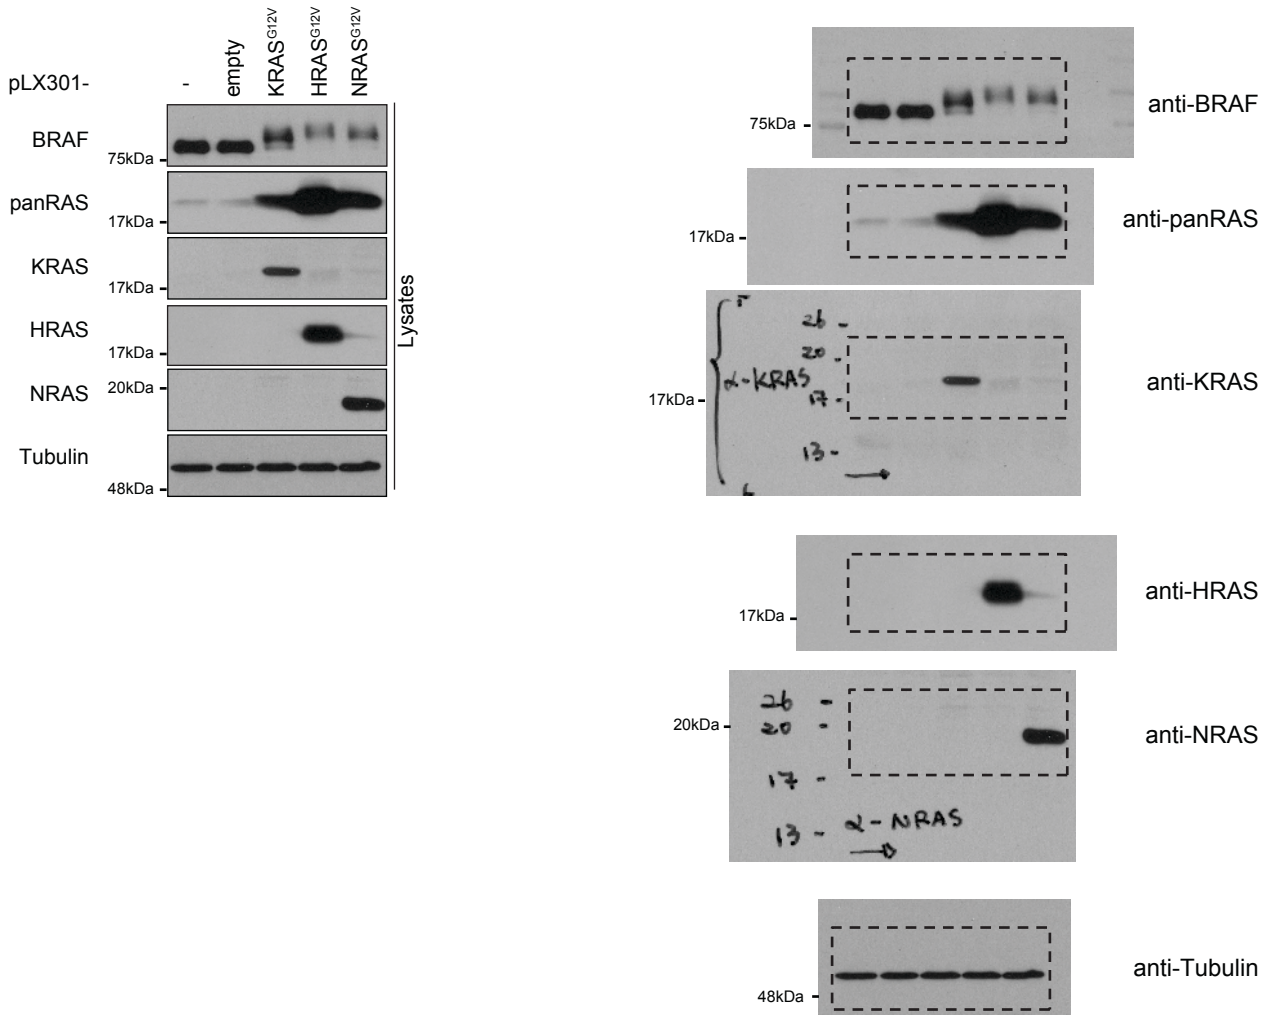

Extended Figure 6

**b**

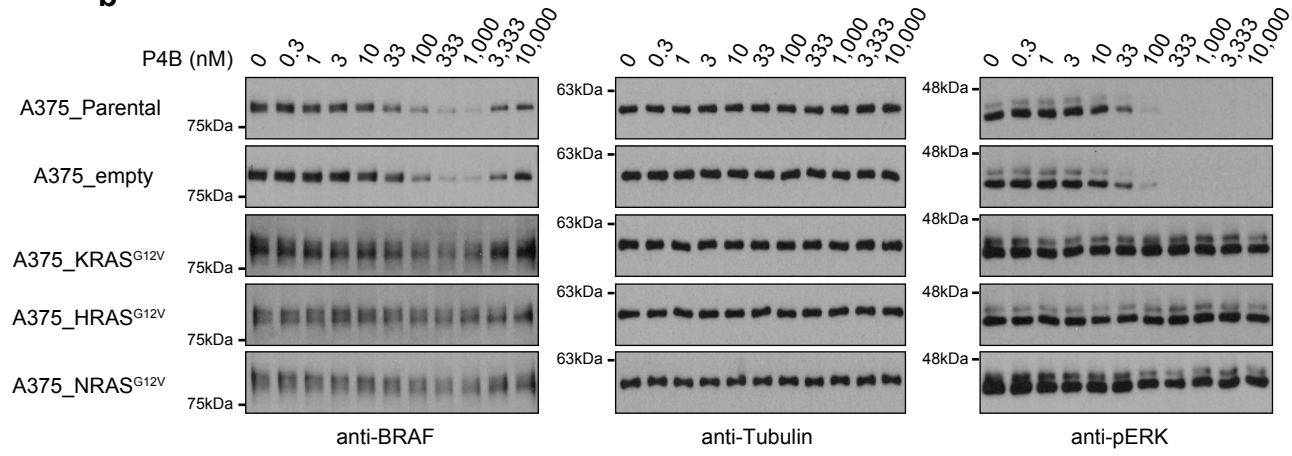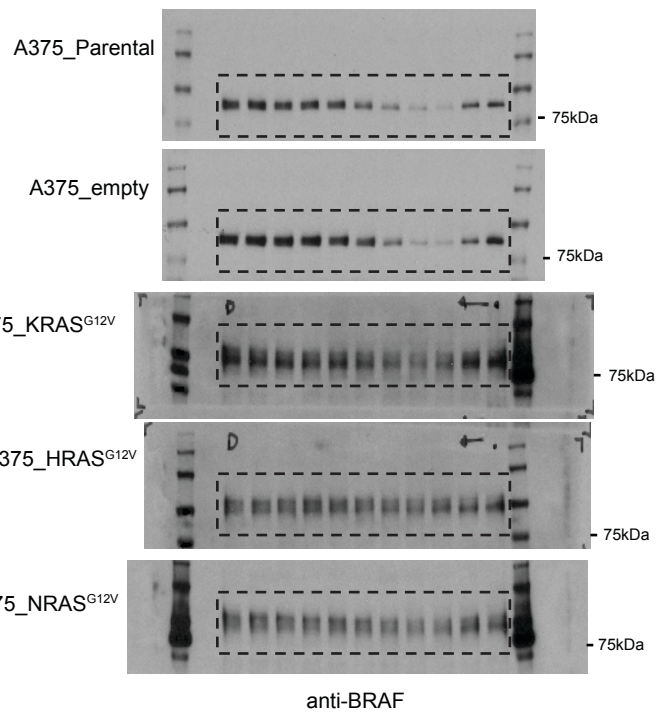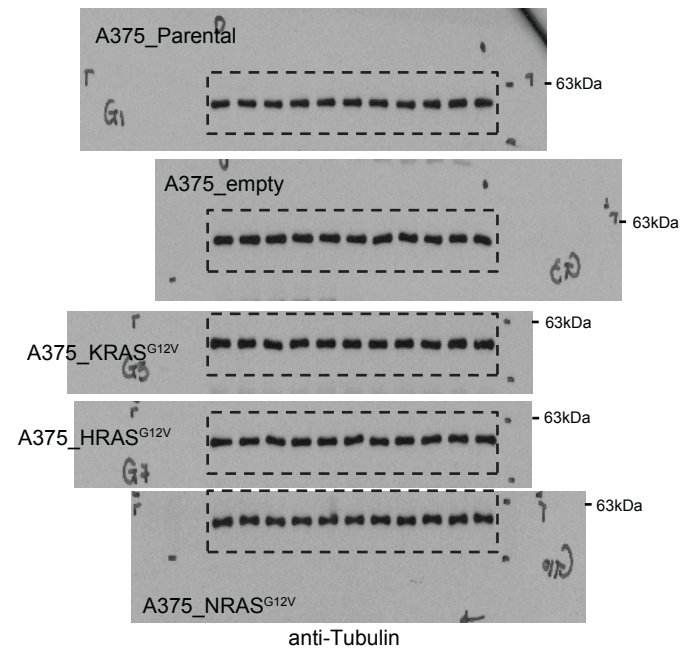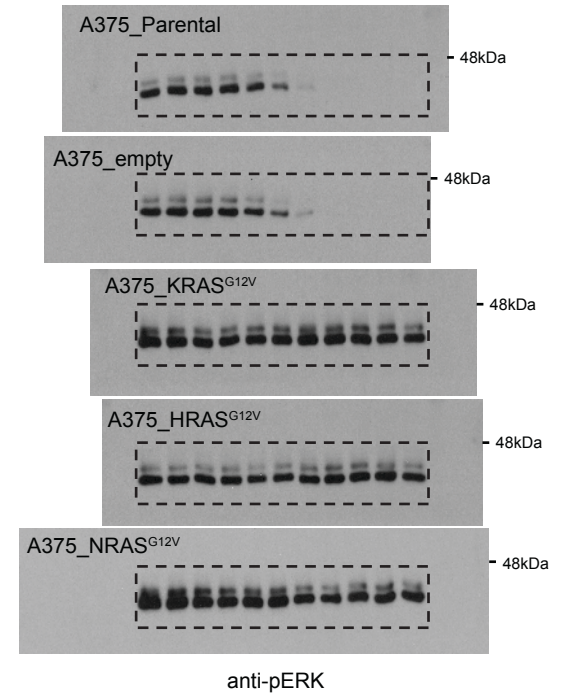

Extended Figure 6

C

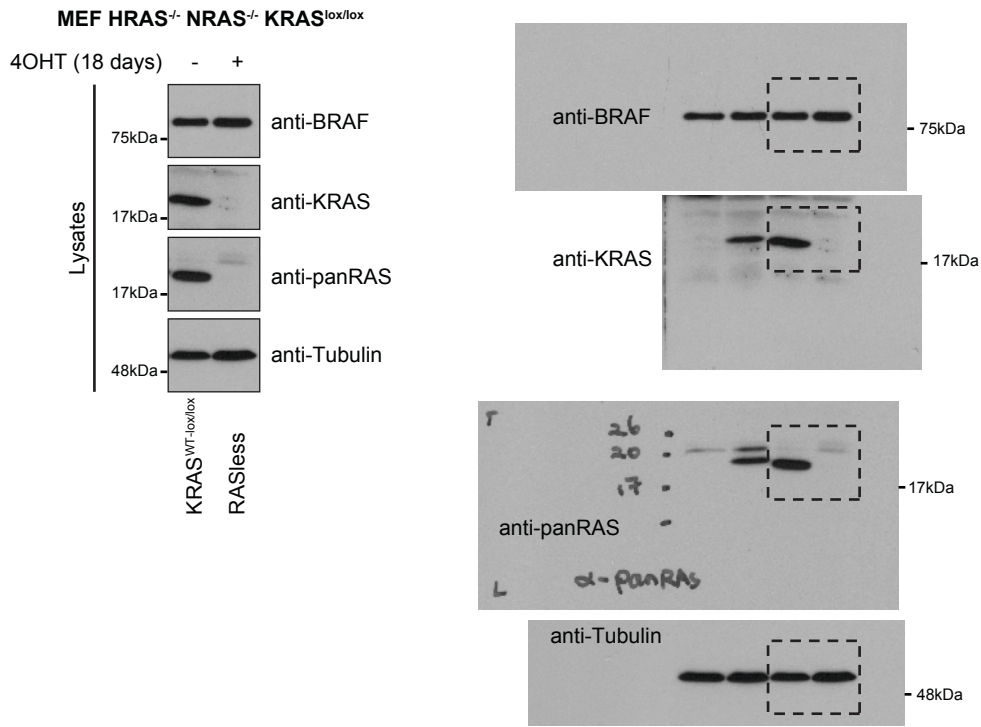

Extended Figure 6

d

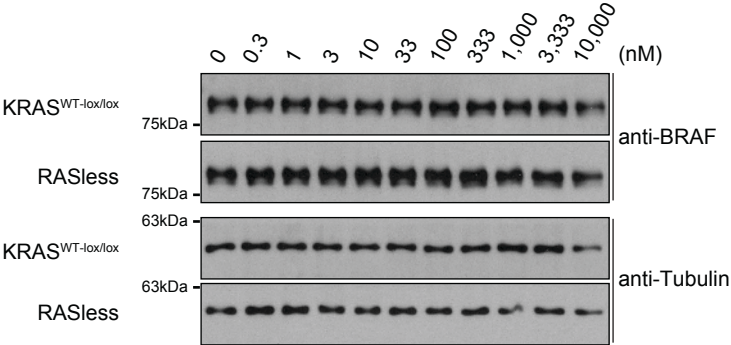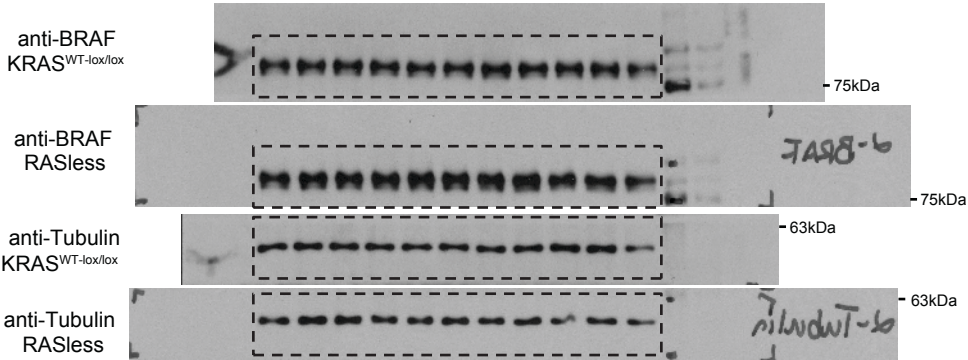

Extended Figure 6

9

RASless + BRAF<sup>V600E</sup>

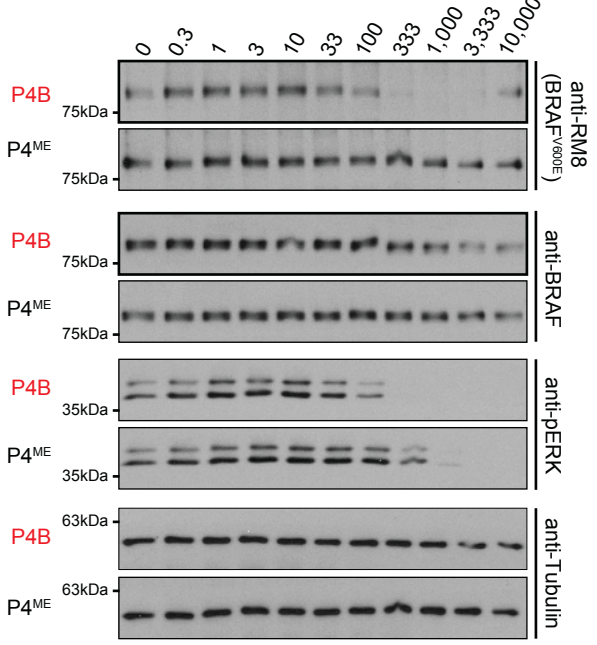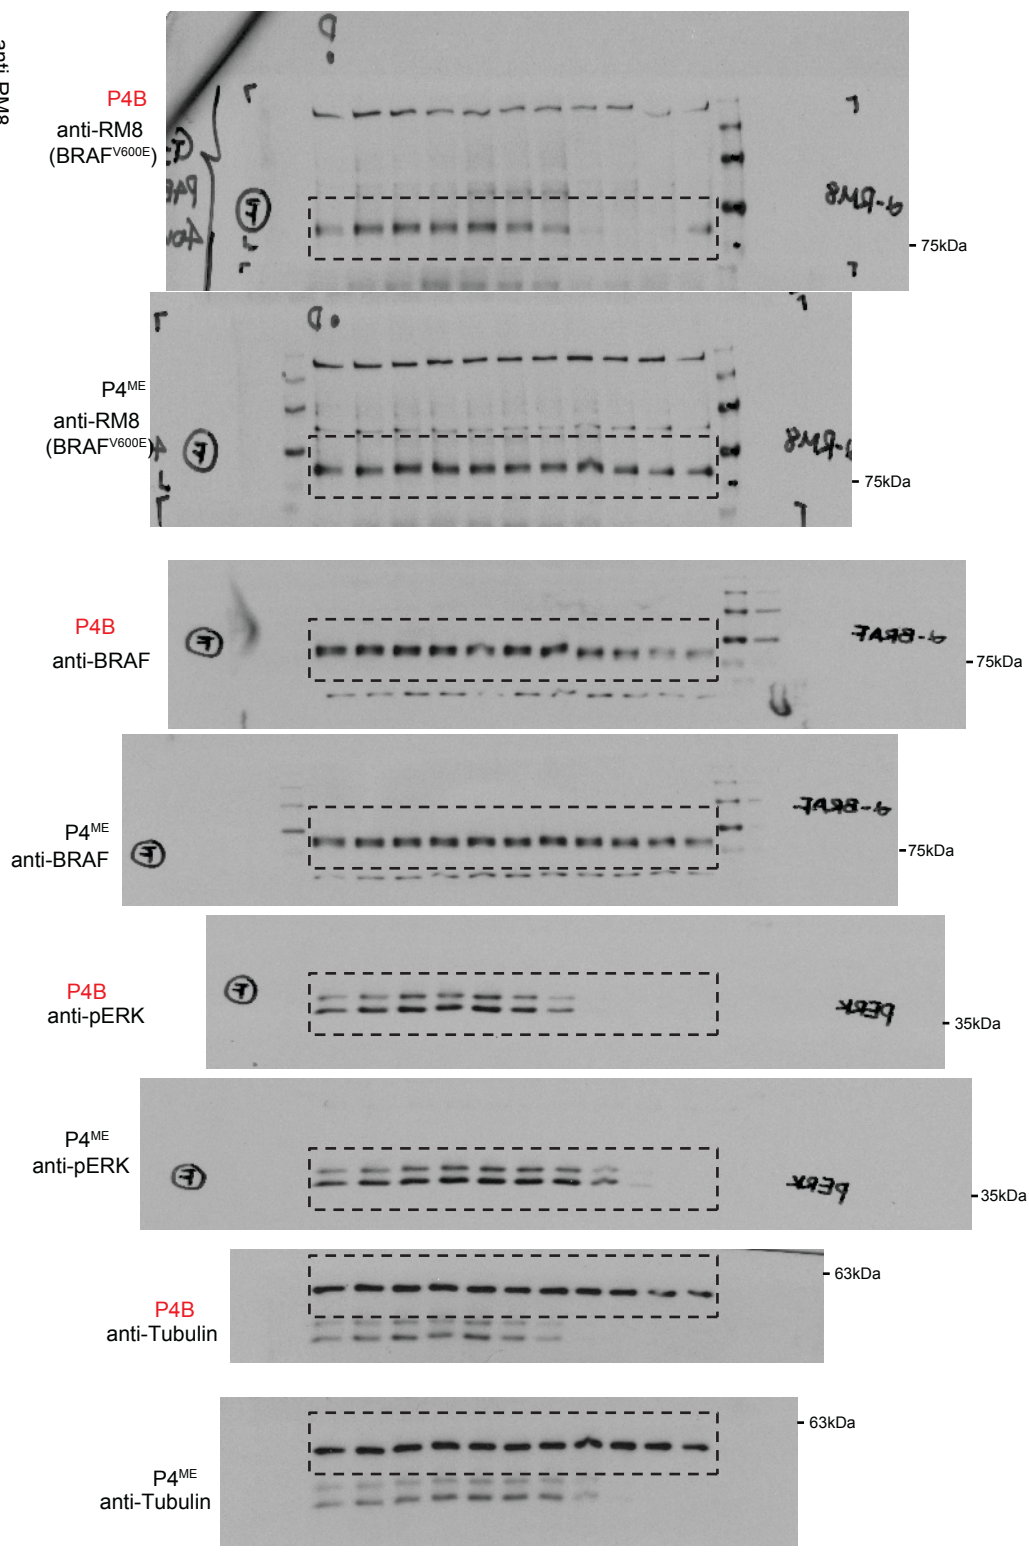

Supplement: NIHMS1652685-supplement-1652685_SourceData_ExtData_Fig6.pdf [file NIHMS1652685-supplement-1652685_SourceData_ExtData_Fig6.pdf]
