# Supplementary material
Source: PubMed Central journal article supplement (PMC7862923)

Extended Figure 10a

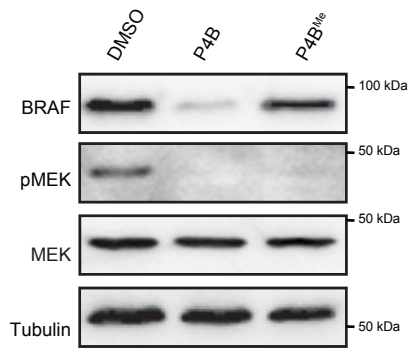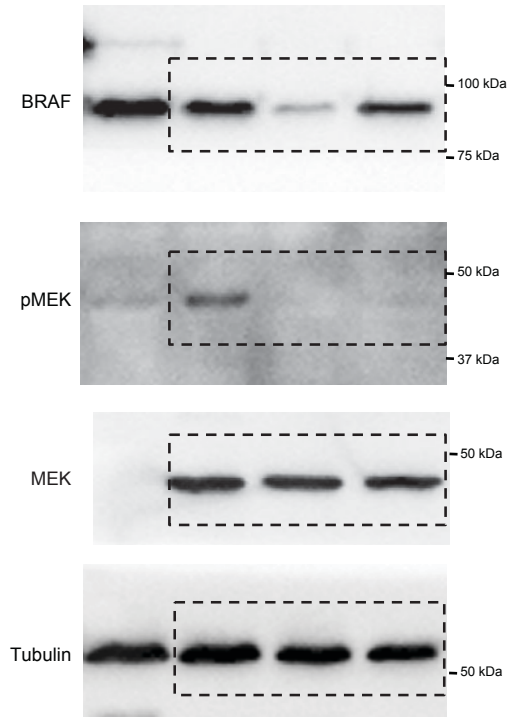

Supplement: NIHMS1652685-supplement-1652685_SourceData_ExtData_Fig10.pdf [file NIHMS1652685-supplement-1652685_SourceData_ExtData_Fig10.pdf]

# Extended Figure 4a

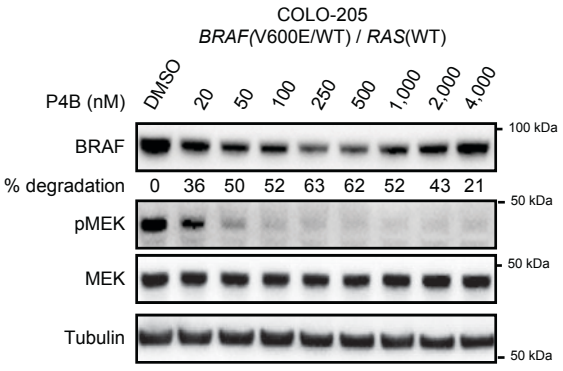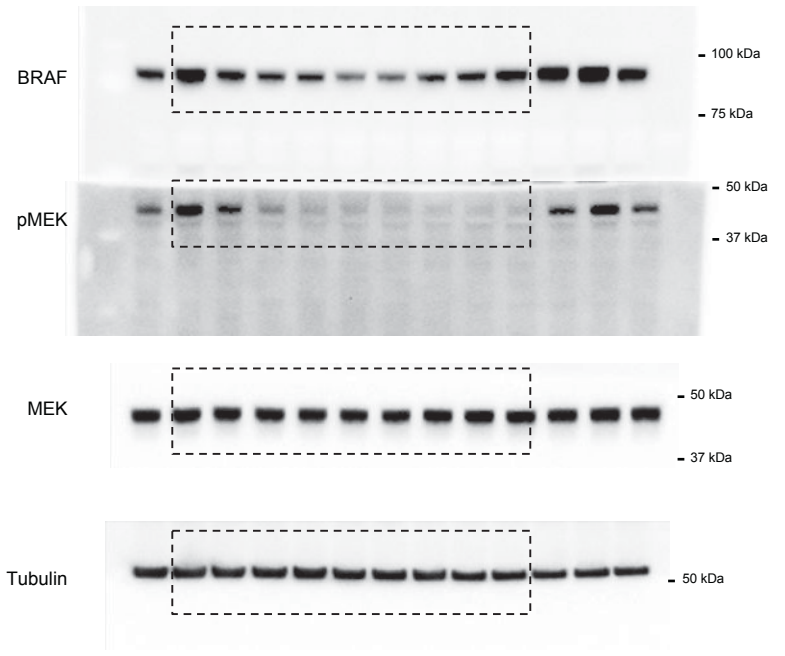

# Extended Figure 4b

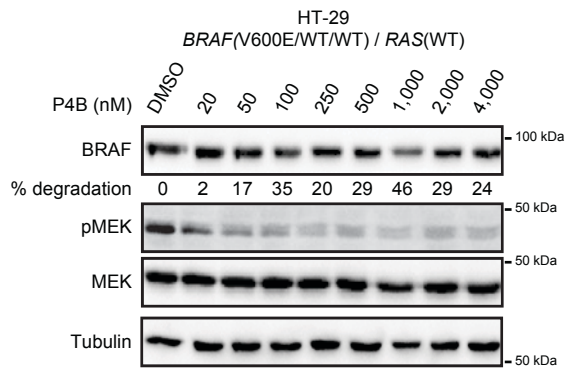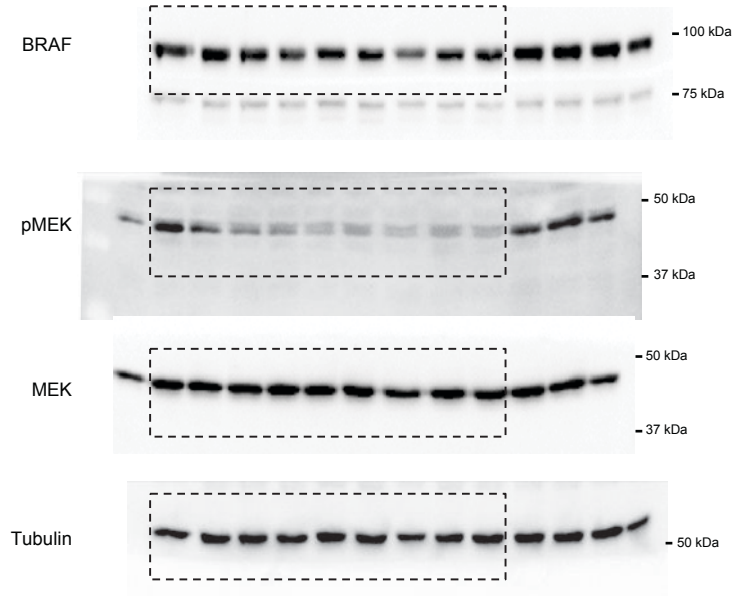

# Extended Figure 4c

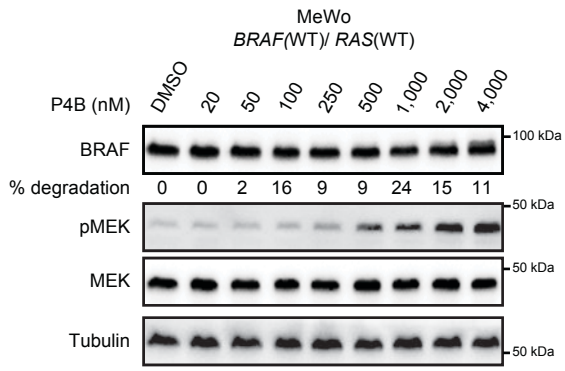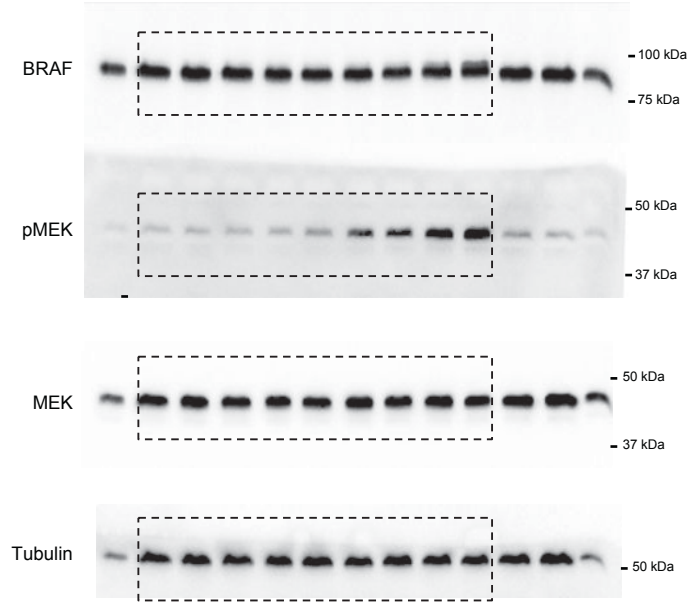



# Extended Figure 4e

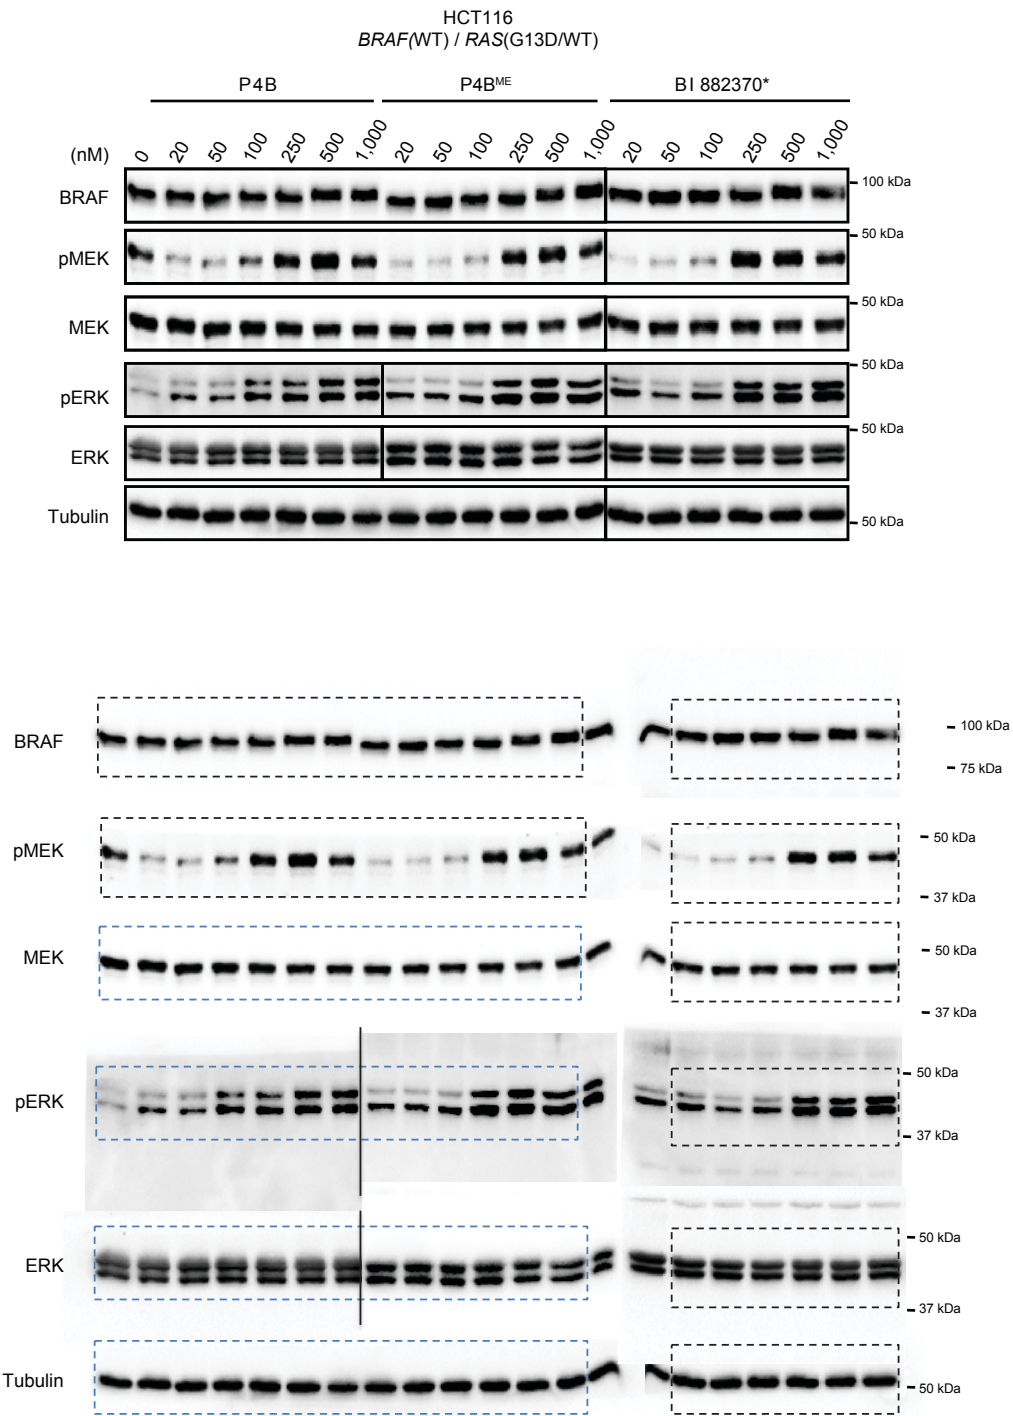

Supplement: NIHMS1652685-supplement-1652685_SourceData_ExtData_Fig4.pdf [file NIHMS1652685-supplement-1652685_SourceData_ExtData_Fig4.pdf]

# Extended Figure 5

**a**

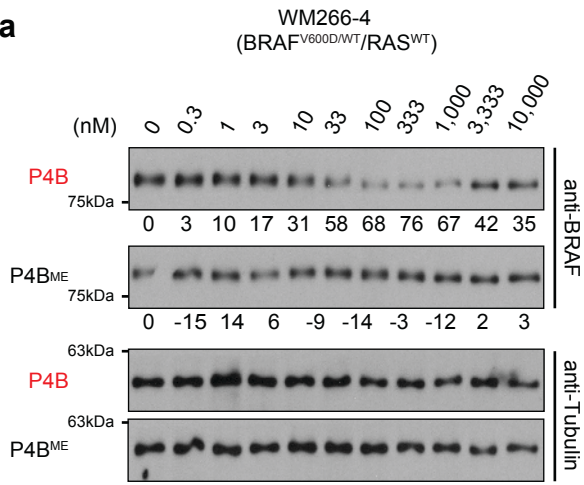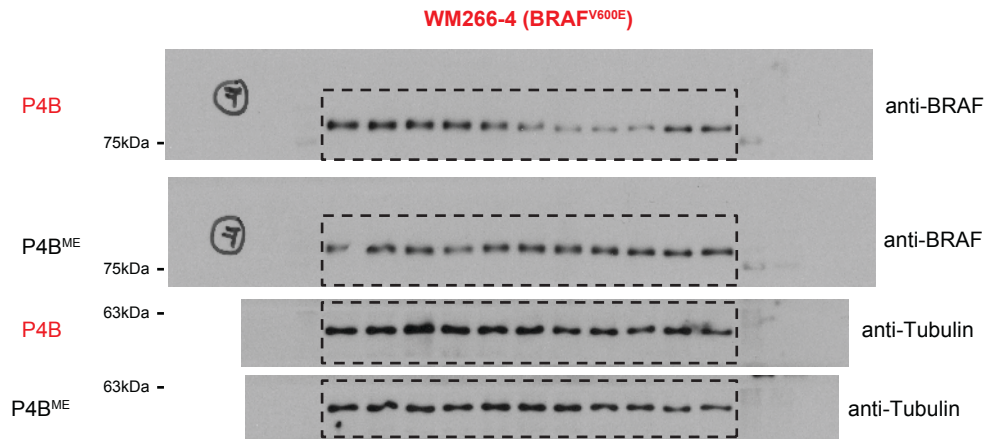

# Extended Figure 5

**b**

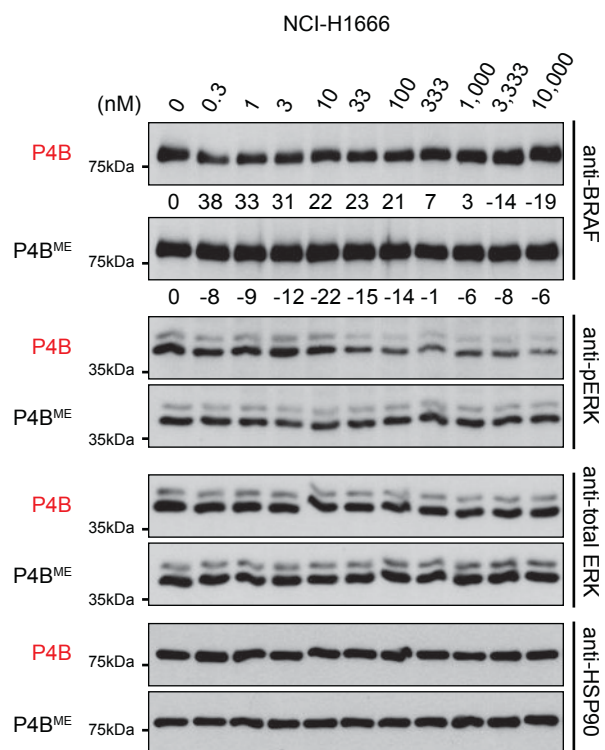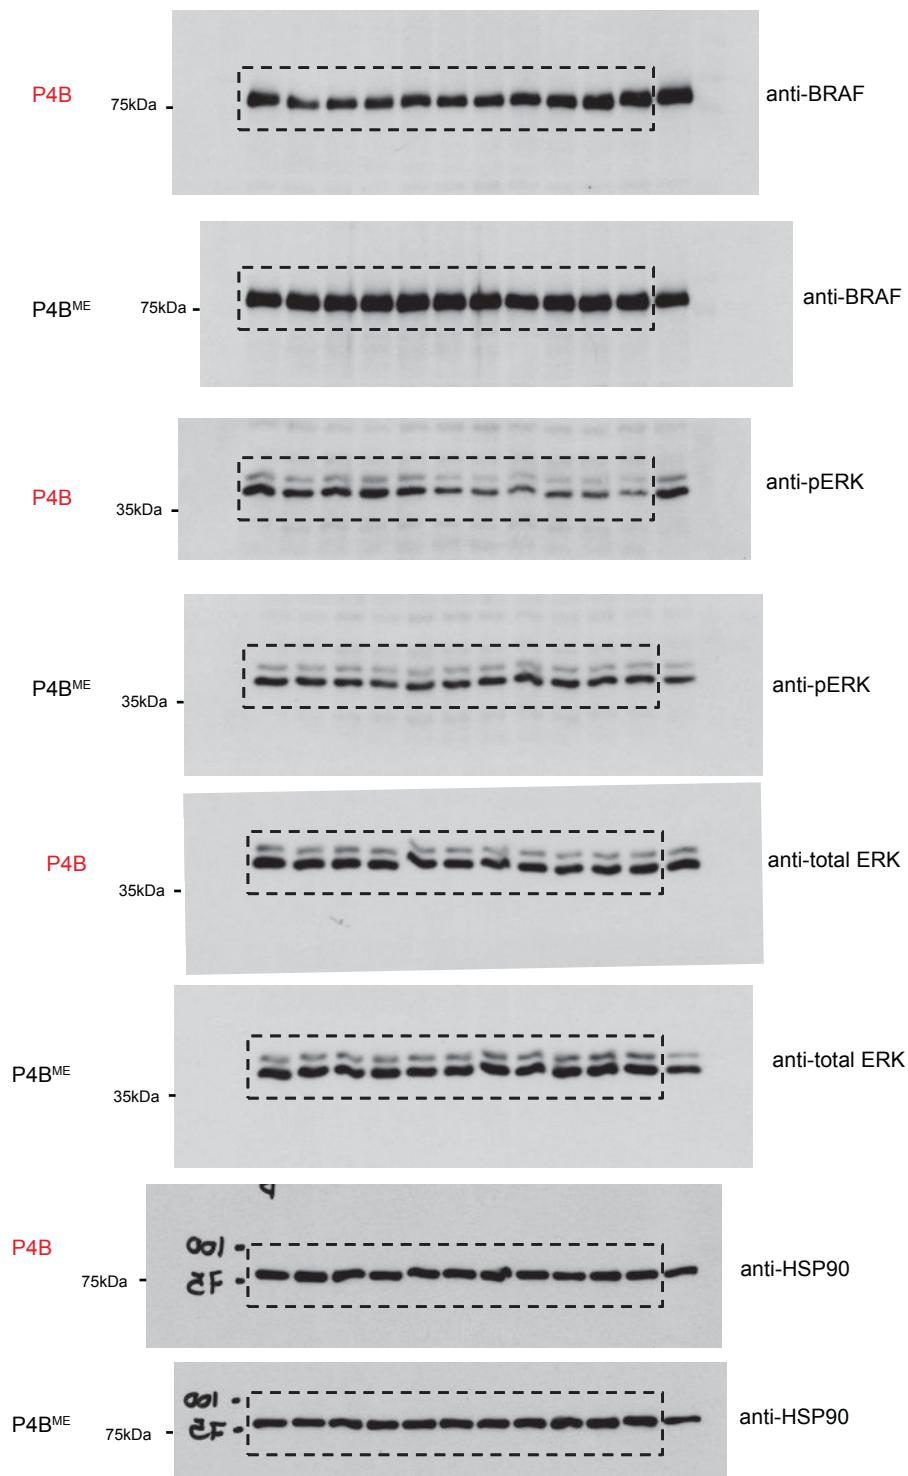

Extended Figure 5

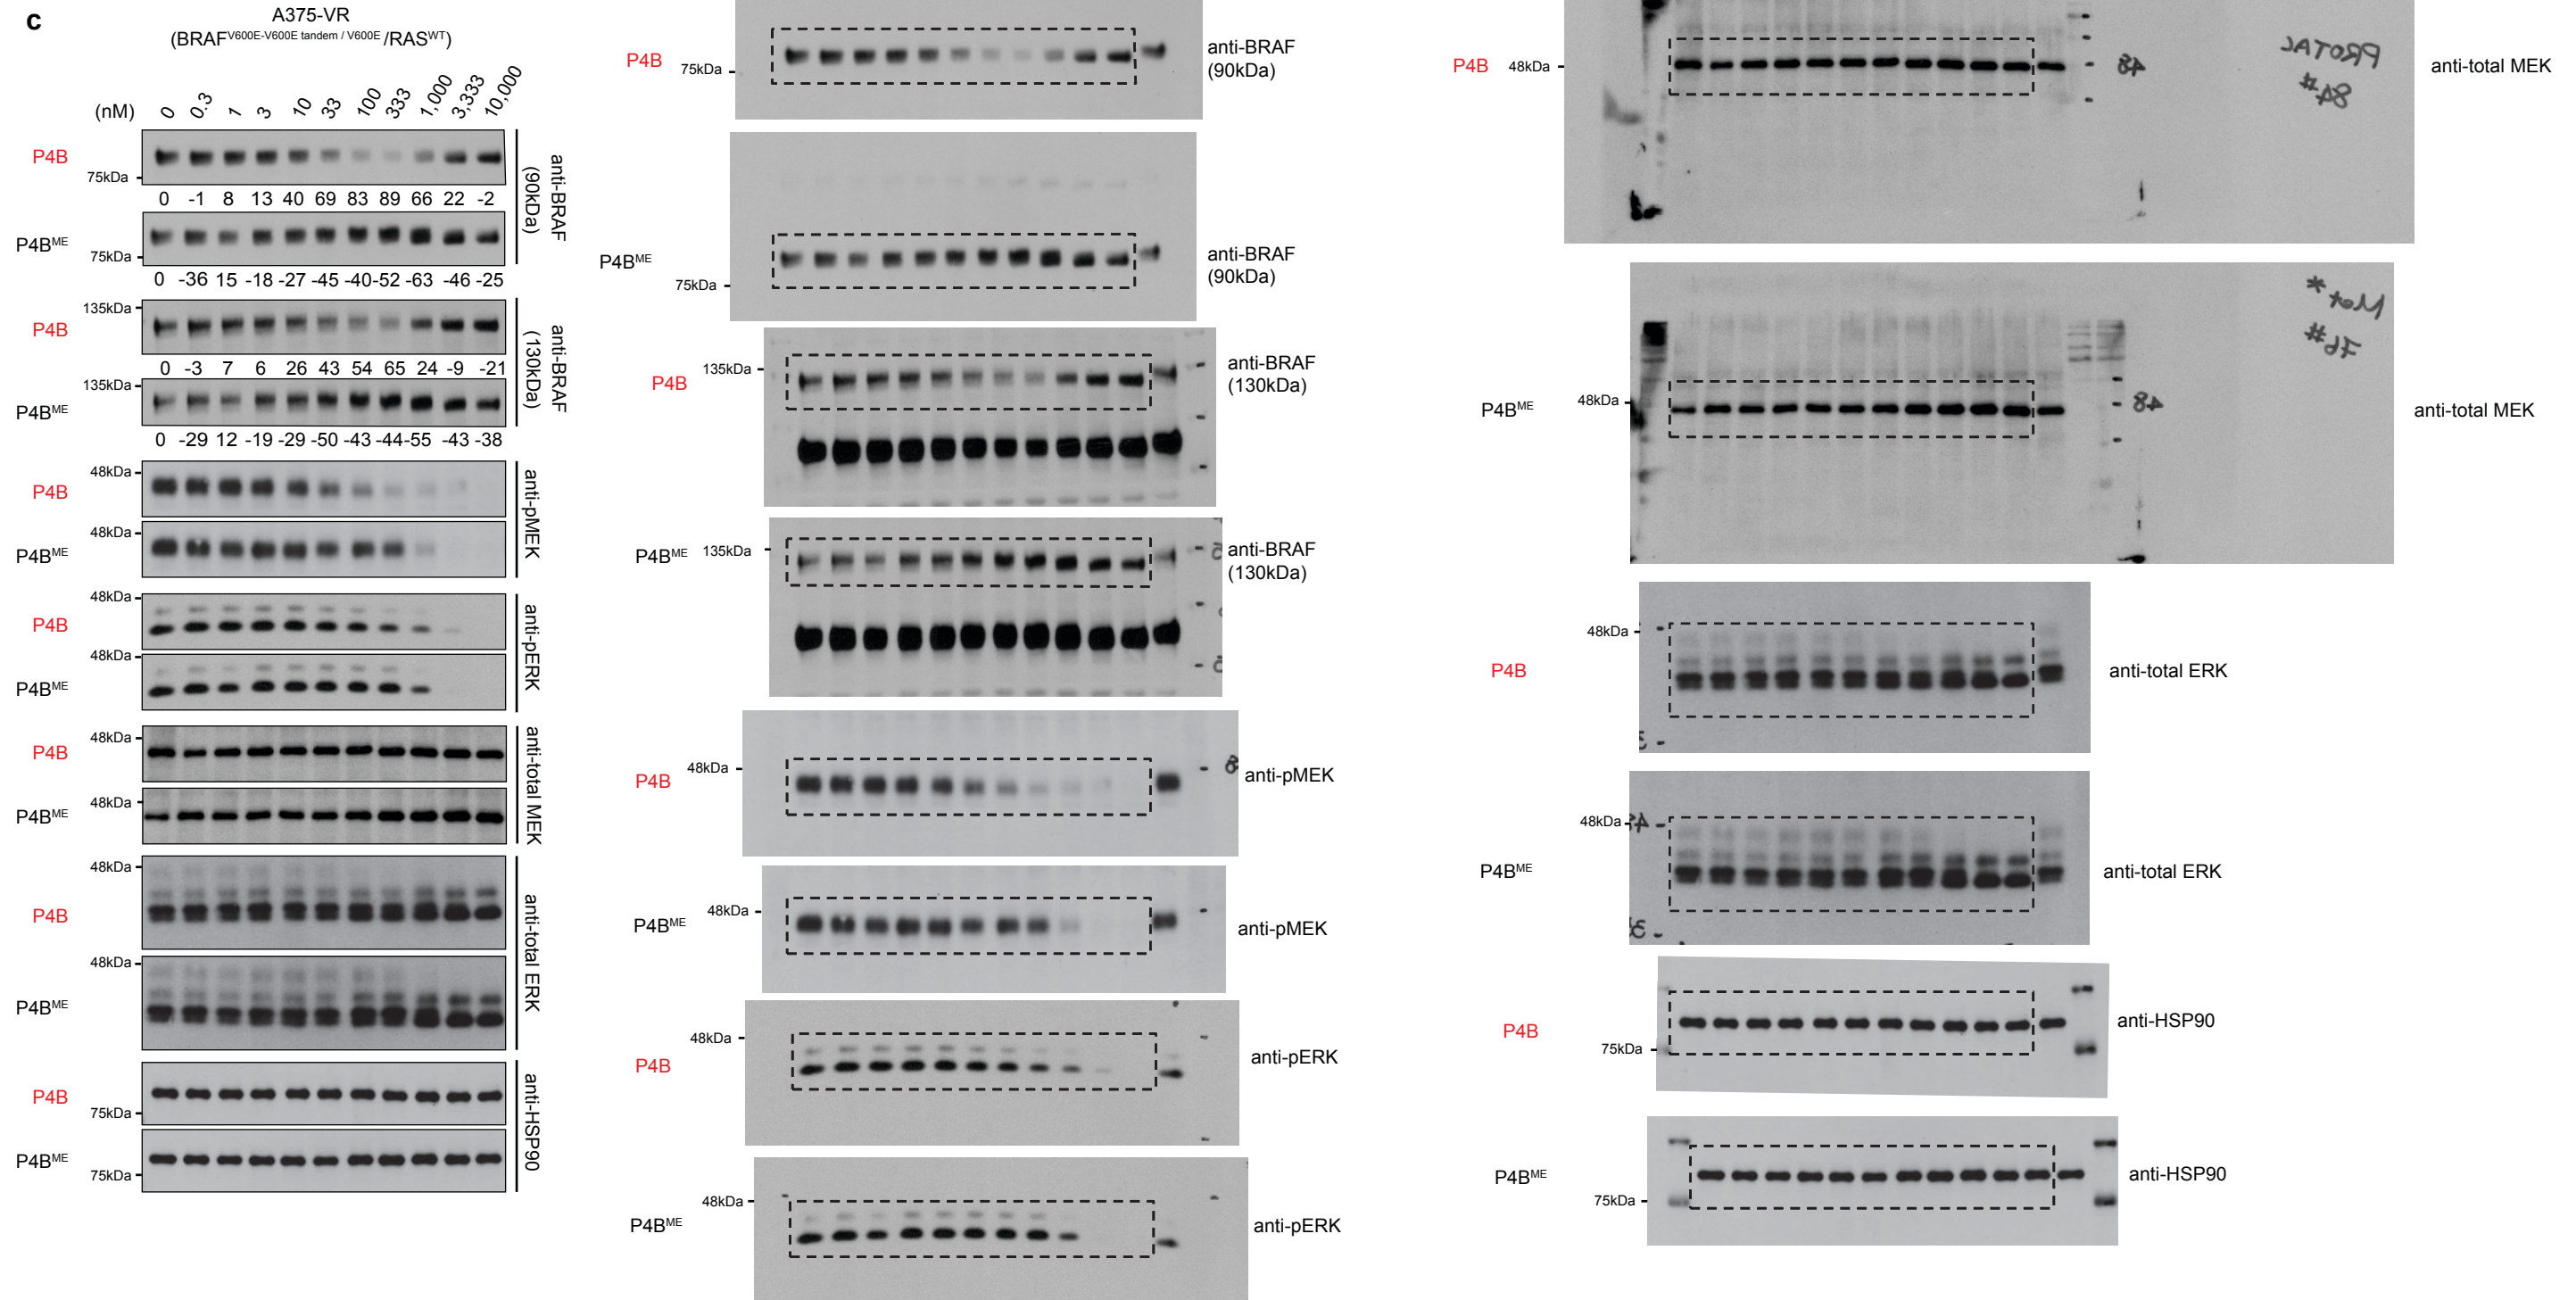

Supplement: NIHMS1652685-supplement-1652685_SourceData_ExtData_Fig5.pdf [file NIHMS1652685-supplement-1652685_SourceData_ExtData_Fig5.pdf]

# Extended Figure 8a

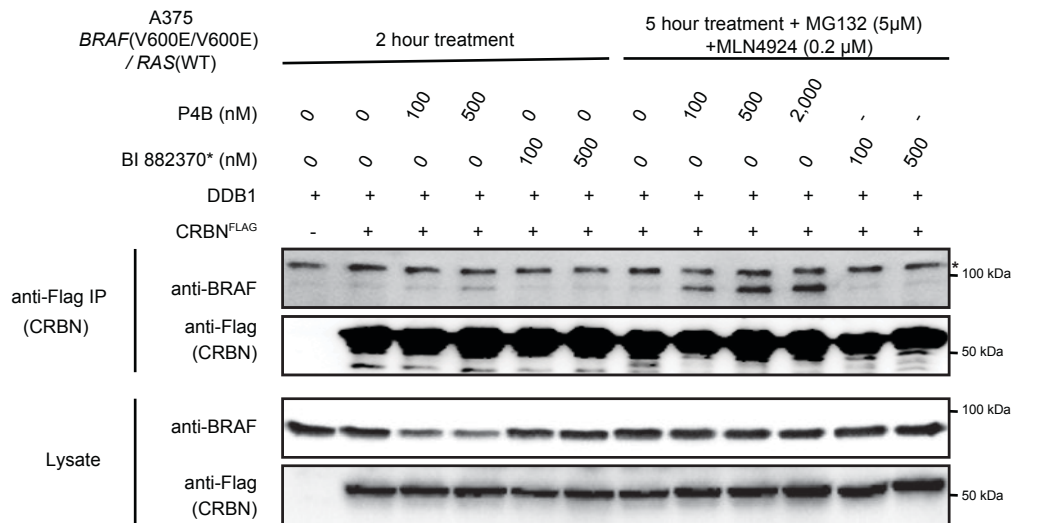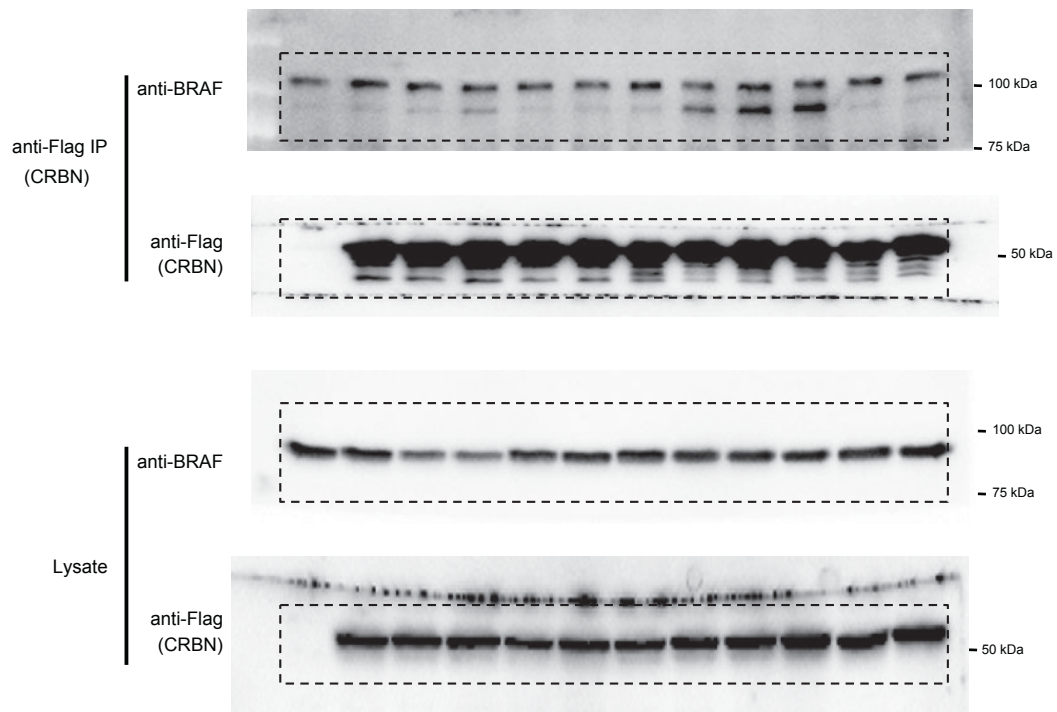

Supplement: NIHMS1652685-supplement-1652685_SourceData_ExtData_Fig8.pdf [file NIHMS1652685-supplement-1652685_SourceData_ExtData_Fig8.pdf]

Figure 2a

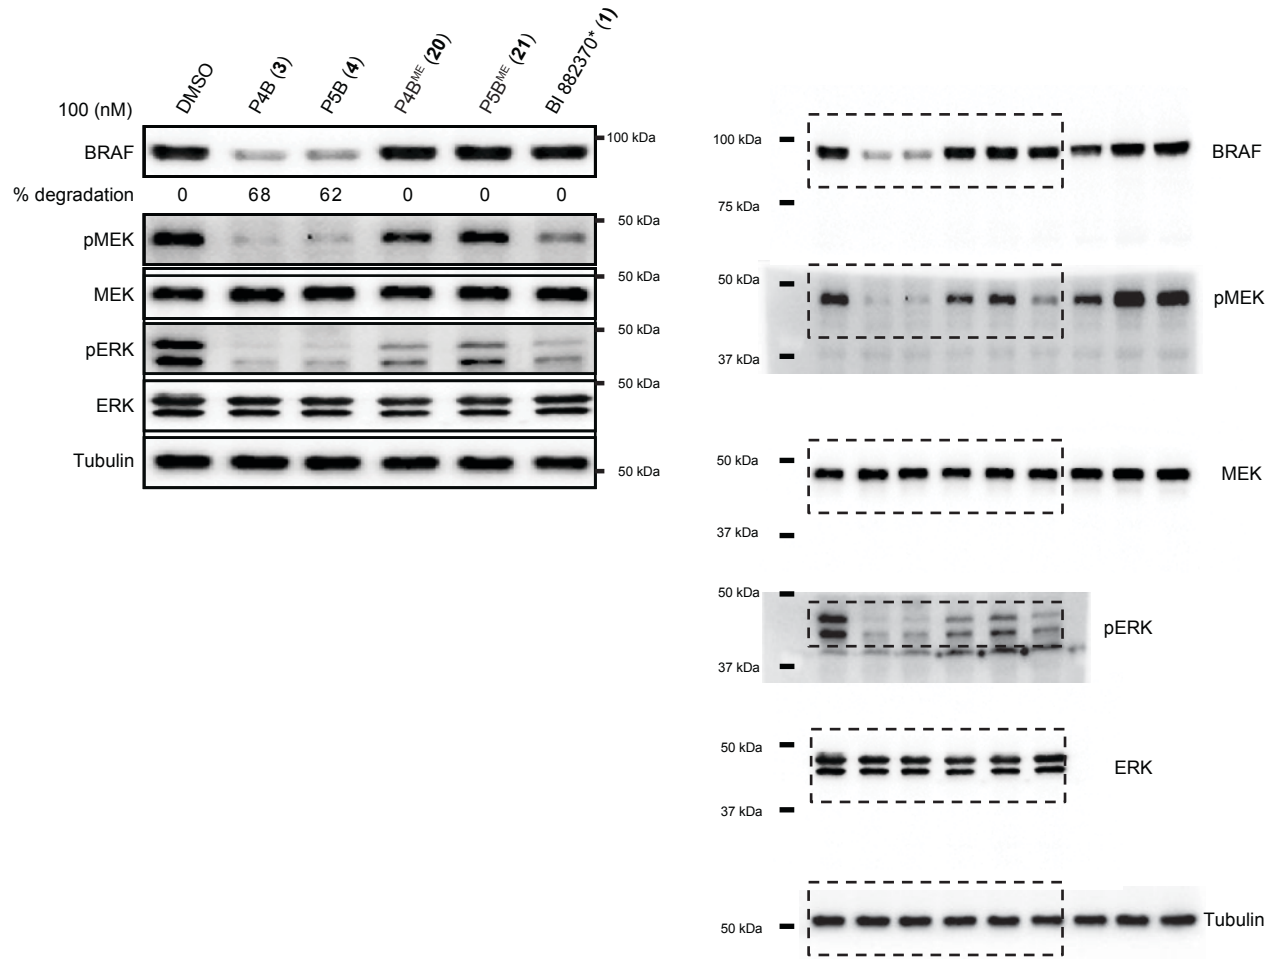

Figure 2b

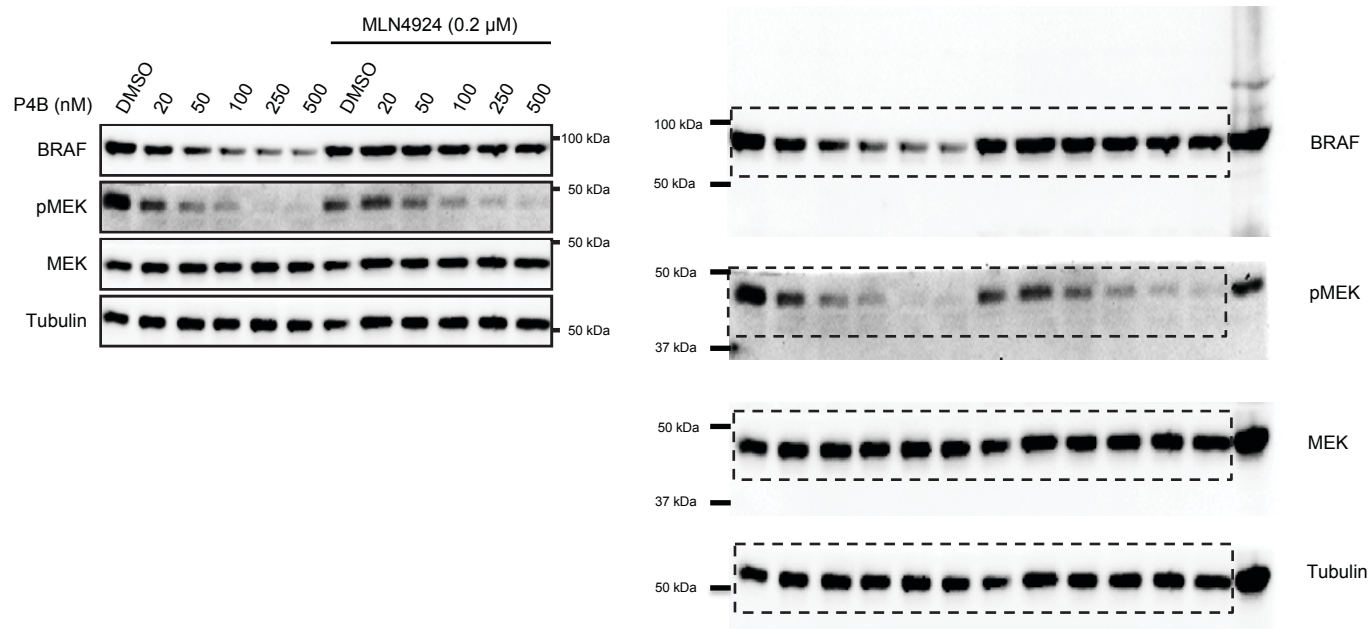



Figure 2d

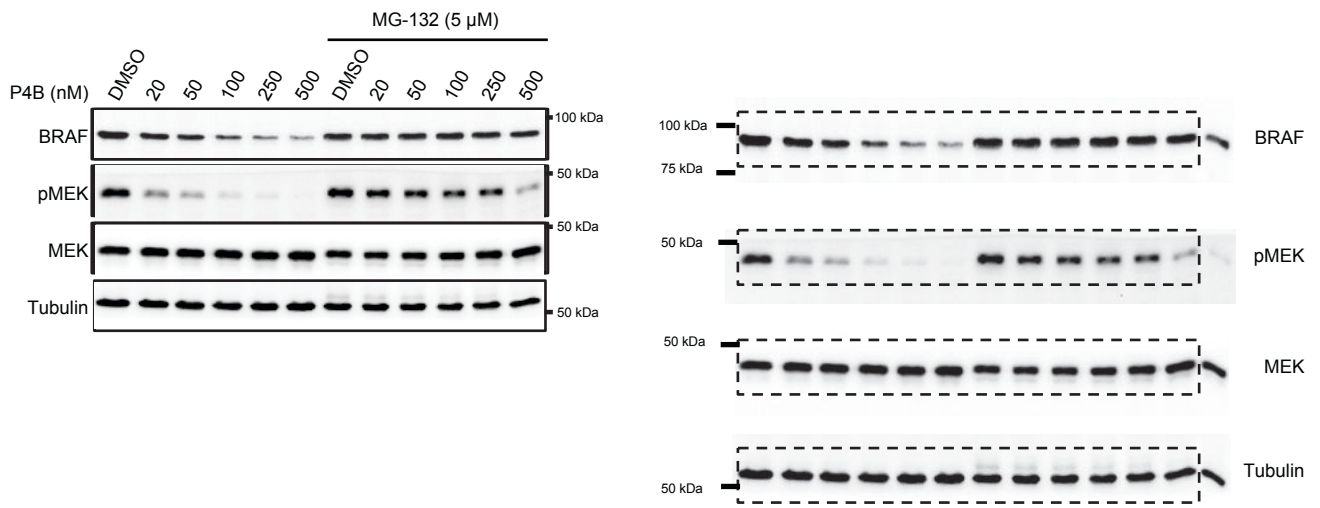

**Figure 2e**

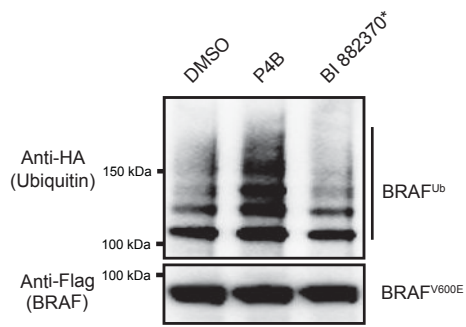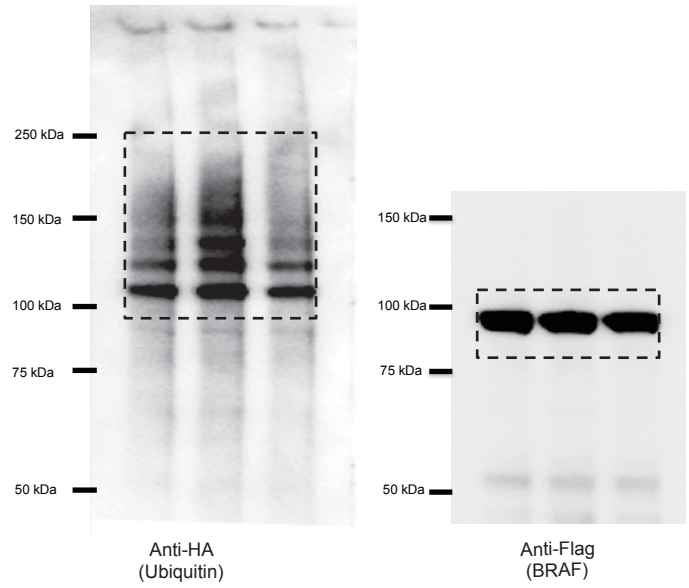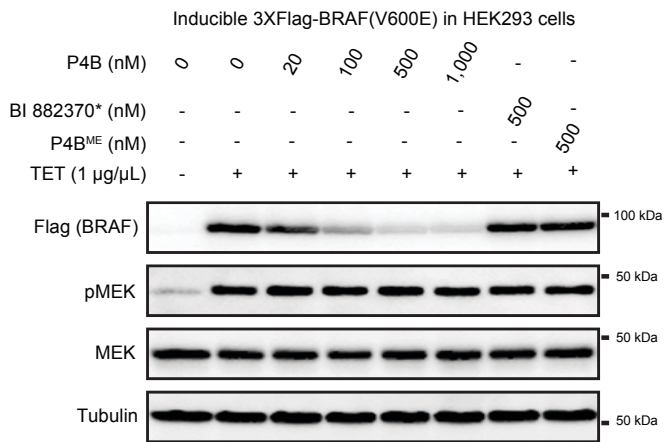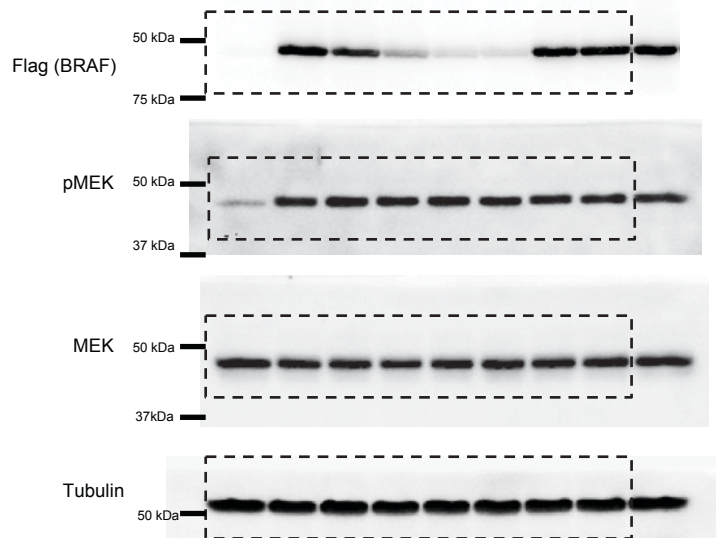

Supplement: NIHMS1652685-supplement-1652685_SourceData_Fig2.pdf [file NIHMS1652685-supplement-1652685_SourceData_Fig2.pdf]

Figure 3a

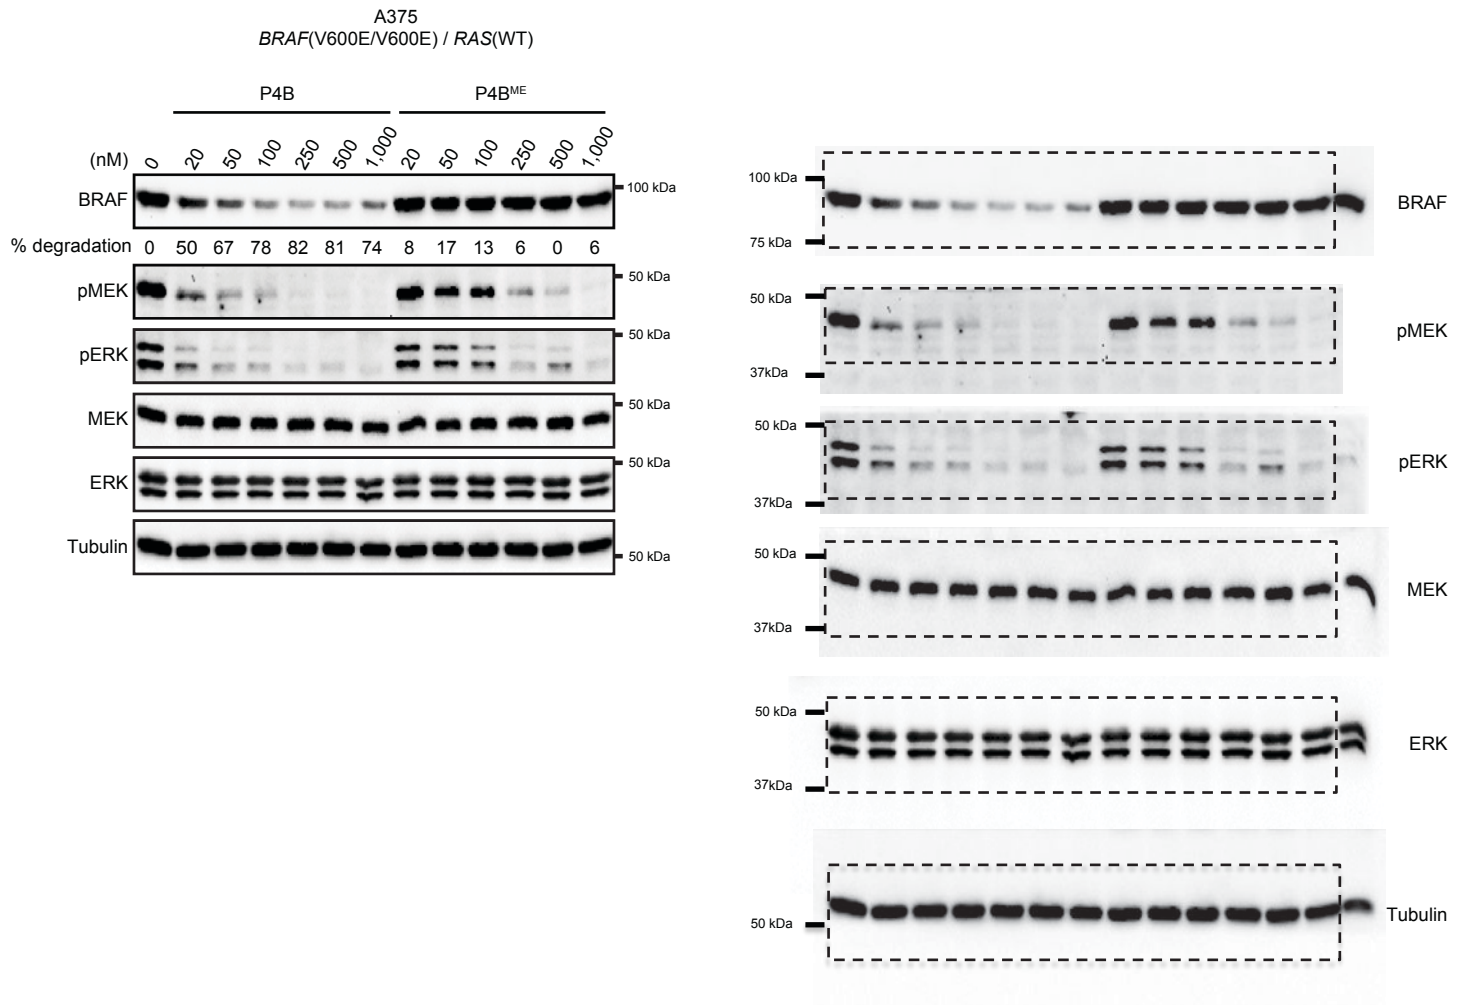

Figure 3b

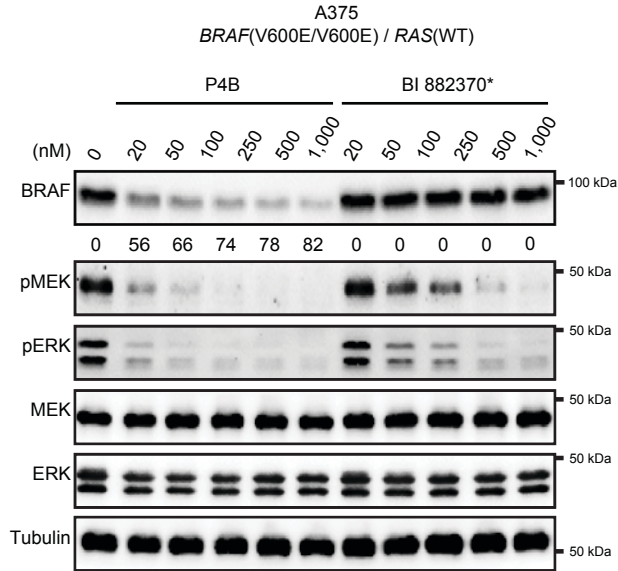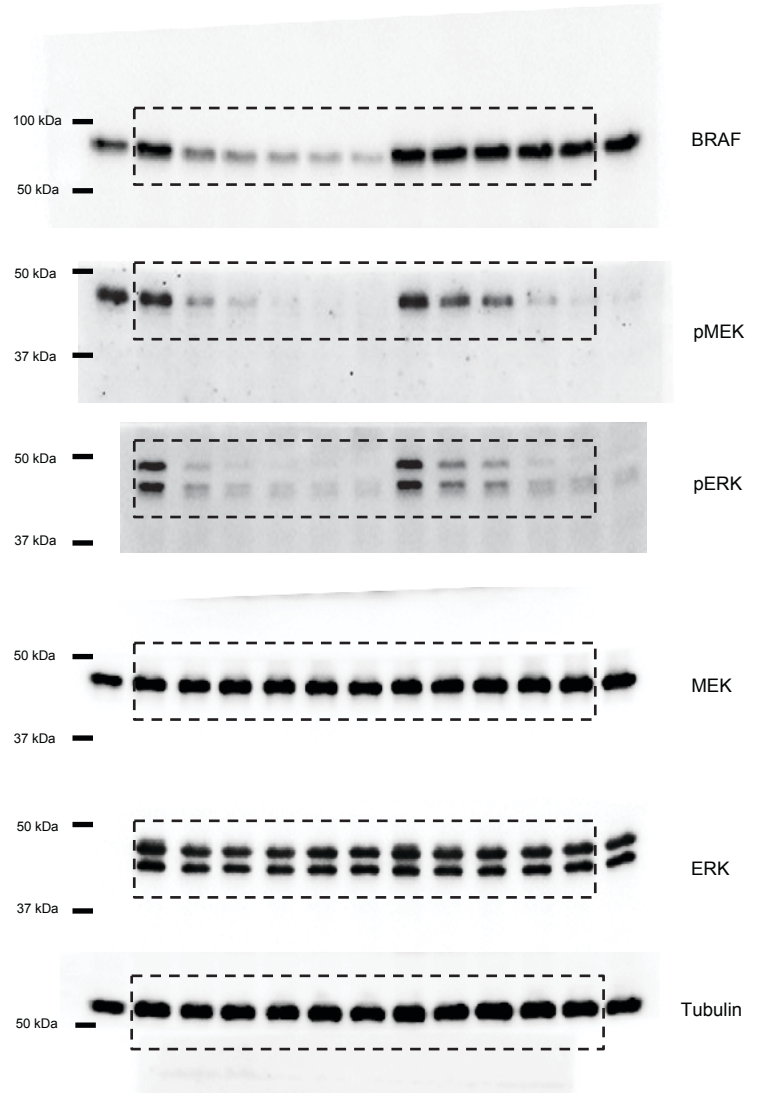

Supplement: NIHMS1652685-supplement-1652685_SourceData_Fig3.pdf [file NIHMS1652685-supplement-1652685_SourceData_Fig3.pdf]

Figure 6a

A375  
BRAF(V600E/V600E) / RAS(WT)

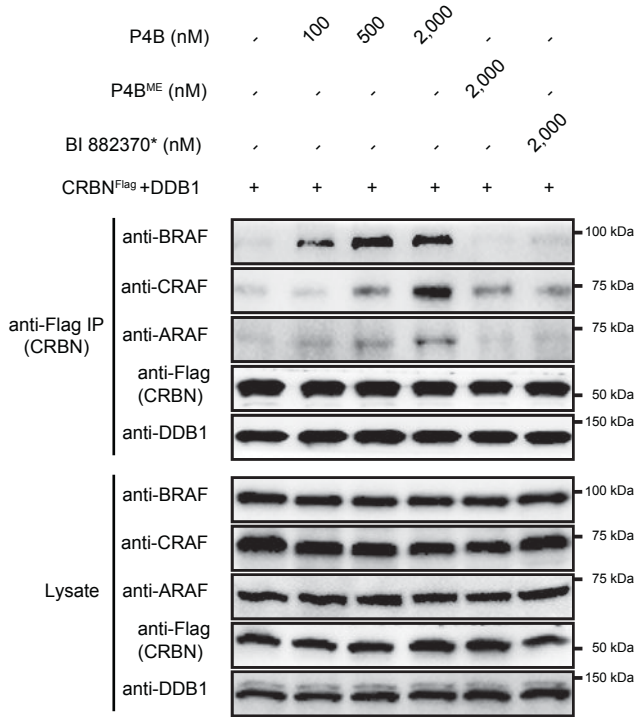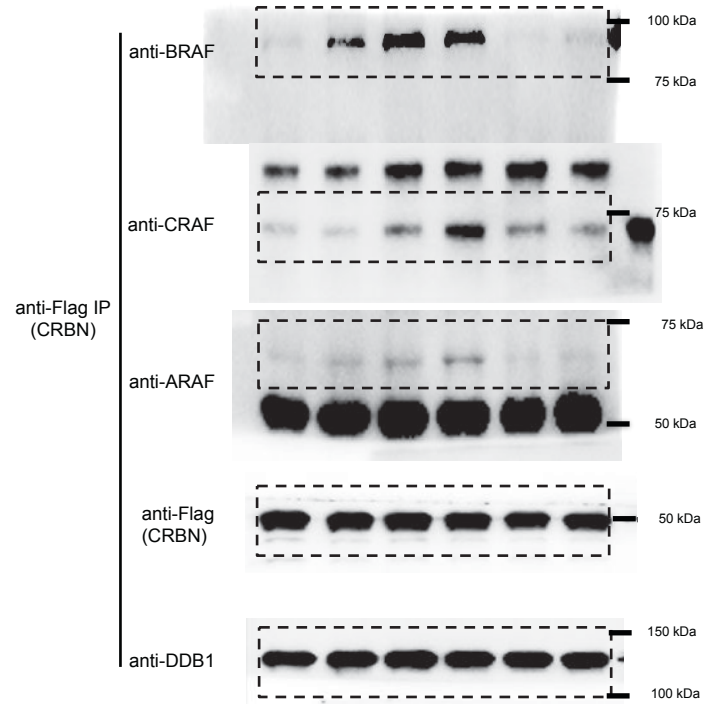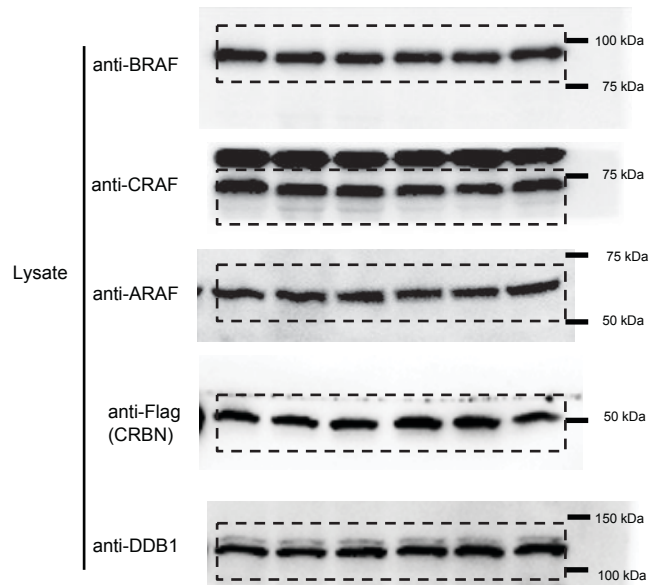

**Figure 6b**

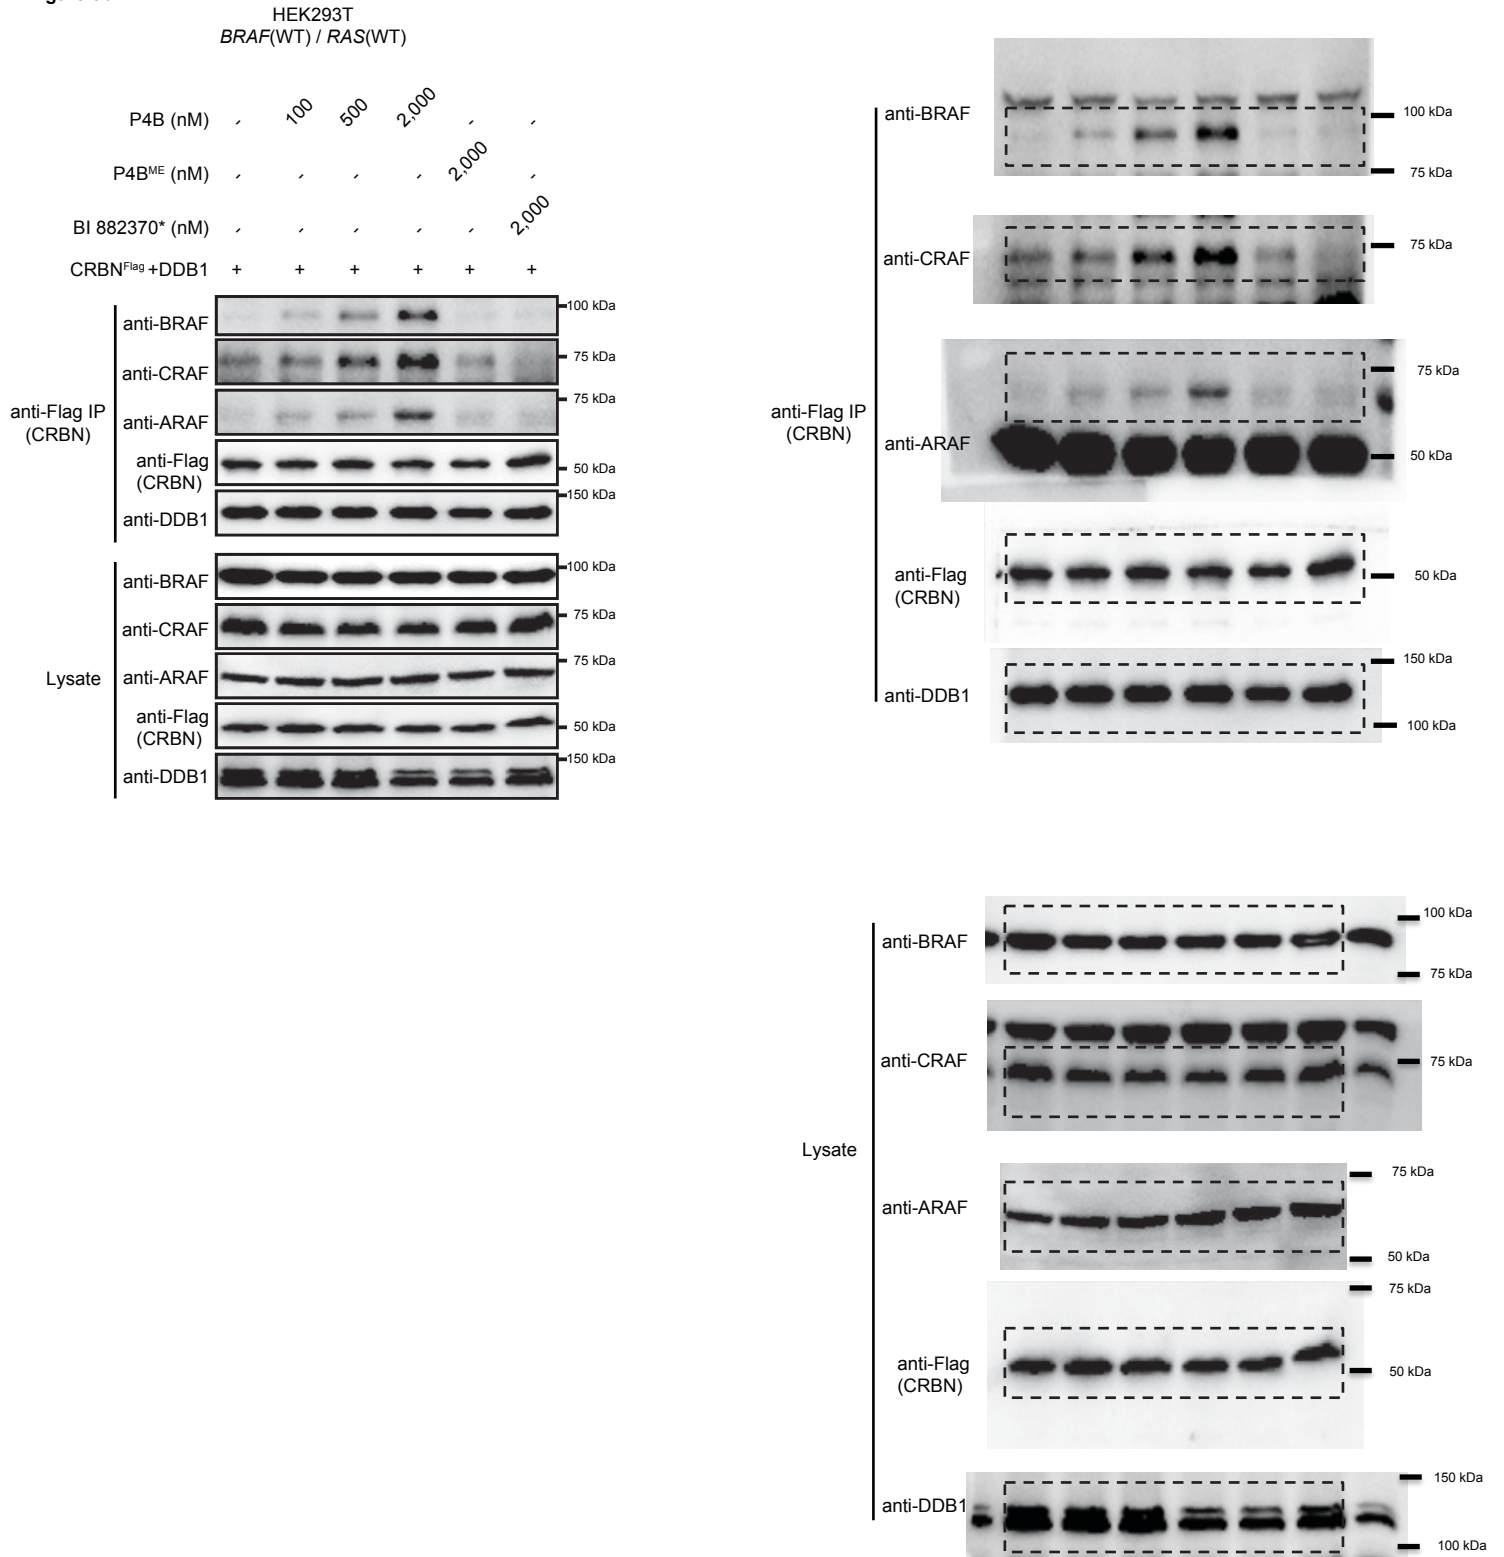

Supplement: NIHMS1652685-supplement-1652685_SourceData_Fig6.pdf [file NIHMS1652685-supplement-1652685_SourceData_Fig6.pdf]
